# Supplementary material
Source: PubMed Central journal article supplement (PMC61132)
Supplement: pnas_98_24_13860__3.pdf [file pnas_98_24_13860__3.pdf]

FSμ- 4/Sal I

total: 1279 bp  
 RGYW (red): 675 bp  
 WRCY (underlined): 611 bp  
 RGYW or WRCY: 706 bp 55.2%  
 non motif: 573 bp 44.8%

1. . . . . 10 . . . . . 20 . . . . . 30 . . . . . 40 . . . . . 50

1 GTCGACCGAT CTGAAATGAG CTACTCTGGA GTAGCTGAGA TGGGGTGAGA  
 51 TGGGGTGAGC TGAGCTGGGC TGAGCTGGAC TGAGCTGAGC TAGGGTGAGC  
 101 TGAGCTGGGT GAGCTGAGCT AAGCTGGGGT GAGCTGAGCT GAGCTTGACT  
 151 GAGCTAGGGT GAGCTGGACT GAGCTGGGGT GAGCTGAGCT GAGCTGGGGT  
 201 AAGCTGGGAT GAGCTGGGGT GAGCTGAGCT GAGCTGGAGT GAGCTGAGCT  
 251 GGGCTGAGCT GGGGTGAGCT GGGCTGGGCT GAGCTGGGGT GAGCTGGGCT  
 301 GAGCTGGGGT GAGCTGAGCT GGGGTGAGCT GAGCTGAGCT GGGGTGAGCT  
 351 GAGCTGAGCT GGGGTGAGCT GAGCTGGGGT GAGCTGAGCT GAGCTGGGCT  
 401 GAGCTGAGGT GAGCTGAGCT GGGGTGAGCT GAGCTGGGGT GAGCTGAGCT  
 451 GAGCTGGGGT AAGCTGGGAT GAGCTGGGGT GAGCTGAGCT GAGCTGGAGT  
 501 GAGCTGAGCT GGGCTGAGCT GGGCTGAGCT GGGGTGAGCT GAGCTGGGGT  
 551 GAGCTGAGCT GAGCTGGGCT GAGCTGAGGT GAGCTGAGCT GGGGTGAGCT  
 601 GAGCTGAGCT GGGGTGAGCT GAGCTGAGCT GGGGTGAGCT GAGCTGGGGT  
 651 GAGCTGAGCT GGGGTGAGCT GAGCTGAGCT GGGGTGAGCT GAGCTGGGGT  
 701 GAGCTGAGCT GAGCTGGGGT GAGCTGAGCT GAGCTGGGGT GAGCTGAGCT  
 751 GAGCTGAGCT GGGGTGAGCT GAGCTGAGCT GGGGTGAGCT GAGCTGAGCT  
 801 GGGGTGAGCT GAGCTGGGGT GAGCTGGGCT GAGCTGAGCT GGGCTGAGCT  
 851 GAGCTGAGCT GAGCTGAGCT GGGGTGAGCT GAGCTGGGCT GAGCTGGGGT  
 901 GAGCTGGGCT GAGCTGGGGT GAGCTGAGCT GGGGTGAGCT GAGCTGAGCT  
 951 GGGGTGAGCT GAGCTGAGCT GGGGTGAGCT GAGCTGAGCT GGGGTGAGCT  
 1001 GAGCTGAGCT GGGGTGAGCT GAGCTAGGGT GAACTGGGCT GGGTGAGCTG  
 1051 GAGTGAGCTG AGCTGAGGTG AACTGGGGTG AGCCGGGATG TTTTGAGTTG  
 1101 AGCTGGGGTA AGATGAGCTG AACTGGGGTA AGATGGGATG AGCTTGTGGTG  
 1151 AGGGGAGCTG GATTGAACTG AGCTTGTGTGA GCTGAGCTGG GGTCAGCTGA  
 1201 GCAAGAGTGA GTAGGAGCTGG CTGGCCAGAA CCAGAATCAA TTAGGCTAAG  
 1251 TGAGCCAGAT TCGGCTGGGA TCGGTCGAC

FS $\alpha$ - 2/Cl aI

total: 1169 bp  
 RGYW (red): 628 bp  
 WRCY (underlined): 324 bp  
 RGYW or WRCY: 677 bp 57.9%  
 non motif 495 bp 42.1%

1 . . . . . 10 . . . . . 20 . . . . . 30 . . . . . 40 . . . . . 50

1 ATCGATGAGC TTGGCTGAGA TGAACCATAA TGAGCTG~~GG~~A TGAGCTGAGC

51 TACTCTGGCA TGGTCTGGGC TAGGCTAGAA TGGACTGAGC TGAGCTCAGC

101 TGAATGGGGT TAAATTAGAC TAGGCTACCC AACTAGGCC AGGCTGGGCT

151 GGGCTGGGTG GGTTGTGCTG AGCTGGAATA AACTGGACTG GACTAGCTAA

201 ACTAGATTGG CATGGTCTGT GCTGACCTGG ACTGGGCTAG GGTTGGATGG

251 GCTCAATAAC TGGGCTAATC CAAGCTAGGC TGCCTGAGCT GGGCTGGGCT

301 GAGCTGAGCT AGGCTGGAAT AGGCTGGGCT GGGCTGGGCT GGTGTGAGCT

351 GGGCTAGGCT GAGCTGAGCT GGAATGAGCT GGGATGGGCT GAACTAGGCT

401 GGAATAGGCT GGGCTGGCTG GTGTGAGCTG GGCTAGGCTG AGCTGAGCTG

451 GAATGAGCTG GGATTGGCTA GAATAGGCTG GGCTGGACTA GTGTTAGCTG

501 GGTTAGGCTG GGCTGAGCTG GAATGAGCTG GGATGAGCAG AGCTAGGCTG

551 GAATAGGCTG GGCTGGGCTG GTGTGAGCTG GGTTAGGCTG AGCTGAGCTG

601 AGCTGAGCTG GAATGAGCTG GGATGAGCTG AGCTAGGCTG GAATAGGCTG

651 GACTGGGCTG GTGTGTGAGC TAGGTTAGGC TGGGCTGAGC TGGAATGAGC

701 TGGGTTGAAC TGAGCAAGGC TGGATGGAAT AGGCTGGGCT GGGCTGGTGT

751 GAGCTGGGCT AGGCTGAGCT GAGCTGGGAT GAGCTGAGCT AGGCTAGAAT

801 AGGCTGGGCT GACTAGTGT TAGCTGGGTT AGGCTGGGCT GAGCTGGAAT

851 GAGCTGGGAT GAGCAGAGCT AGGCTGGAAT AGGCTGGGCT GGGCTGGTGT

901 GAGCTGGGTT AGGCTGAGCT GAGCTGAGCT GGAATGAGCT GGGATGAGCT

951 GAGCTAGGCT GGAATAGGCT GGGCTGGGCT GGTGTGTGAG CTAGGTTAGG

1001 CTGGGCTGAG CTGGAATGAG CTGGGTTGAA CTGAGCAAGG CTGGATGGAA

1051 TAGGCTGGGC TGGGCTGGTG TGAGCTGGGT TAGGCTGAGC TGAGCTGAGC

1101 TGAGCTGAGC TGAGCTGAGC TGAGCTGAGC TGAGCTGAGC TGAGCTGAGC

1151 TGGAAGGAGA GGCATCGAT
